# Supplementary material for: Soft magnetic Fe5C2–Fe3C@C as an electrocatalyst for the hydrogen evolution reaction
Source: Royal Society of Chemistry journal article supplement (doi:10.1039/c9dt00328b), 2019-01-01
Supplement: c9dt00328b1.pdf [file c9dt00328b1.pdf]

## Supporting Information

### 1. Experimental Section

#### 1.1 Physical characterization

X-ray diffraction (XRD) pattern were recorded to analyze the phase and crystal structure of the as-synthesized samples using a Shimadzu XRD-6100 operating in a  $6^\circ$  step at the range of  $20\text{-}80^\circ$  and using  $\text{CuK}\alpha$  radiation ( $\lambda = 0.15405\text{ nm}$ ). X-ray photoelectron spectroscopy (XPS) was performed on a Thermo VG Scientific Escalab 250 spectrometer with a monochromatic Al  $\text{K}\alpha$  excitation source. Scanning electron microscopy (SEM) images were obtained on an XL-30 (FEI COMPANY) equipped with an EDS spectrometer. The samples were examined with a Philips Tecnai G2 F20 High Resolution Transmission Electron Microscope (HRTEM) to obtain size/shape images of the nanostructured material. The magnetic properties of the synthesized samples were characterized using a vibrating sample magnetometer (VSM, Lake Shore 7404). The hysteresis curve was obtained by changing the magnetic field between  $+17000\text{ Oe}$  and  $-17000\text{ Oe}$ .

#### 1.2 Electrochemical characterization

Hydrogen Evolution Reaction (HER). All electrolysis measurements were performed in an  $\text{N}_2$  saturated  $1\text{ M KOH}$  solution in a CHI 650C electrochemical workstation. Typically, a mixture containing  $735\ \mu\text{L}$  of ultrapure water,  $245\ \mu\text{L}$  of ethanol and  $20\ \mu\text{L}$  of Nafion solution,  $4\text{ mg}$  of catalyst and  $1\text{ mg}$  of acetylene black was dispersed by sonication for 30 minutes. Then  $10\ \mu\text{L}$  of the homogeneous catalyst ink was dropped on a polished glassy carbon electrode having a diameter of  $3\text{ mm}$  ( $0.57\text{ mg}\cdot\text{cm}^{-2}$ ) as a working electrode. Ni foil was used as a counter electrode and  $\text{Hg}/\text{Hg}_2\text{Cl}_2$  electrode was used as a reference electrode. Linear sweep voltammetry was performed at a scan rate of  $5\text{ mV}\cdot\text{s}^{-1}$  to obtain a polarization curve. All potentials were referenced to a reversible hydrogen electrode (RHE) by adding a value of  $(0.24 + 0.059 \times \text{pH})\text{ V}$ .

Electrochemically active surface area (EASA).<sup>[1]</sup> EASA was estimated from the electrochemical double-layer capacitance. The double layer capacitance ( $C_{dl}$ ) was determined with a simple cyclic voltammetry (CV) method. The EASA is then calculated from the double-layer capacitance according to

$$EASA = \frac{C_{dl}}{C_s}$$

where  $C_s$  is the capacitance of an atomically smooth planar surface of the material per unit area under identical electrolyte conditions. An average value of  $C_s = 22\ \mu\text{F}\cdot\text{cm}^{-2}$  is used in this work.<sup>[2]</sup>

## 2. Supporting figures and tables

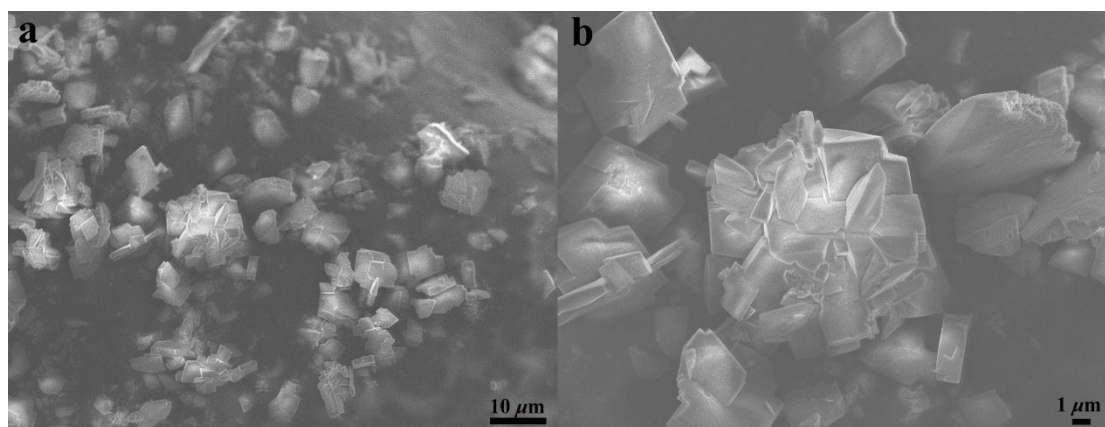

Fig. S1 SEM of iron oxalate dihydrate without PVP.

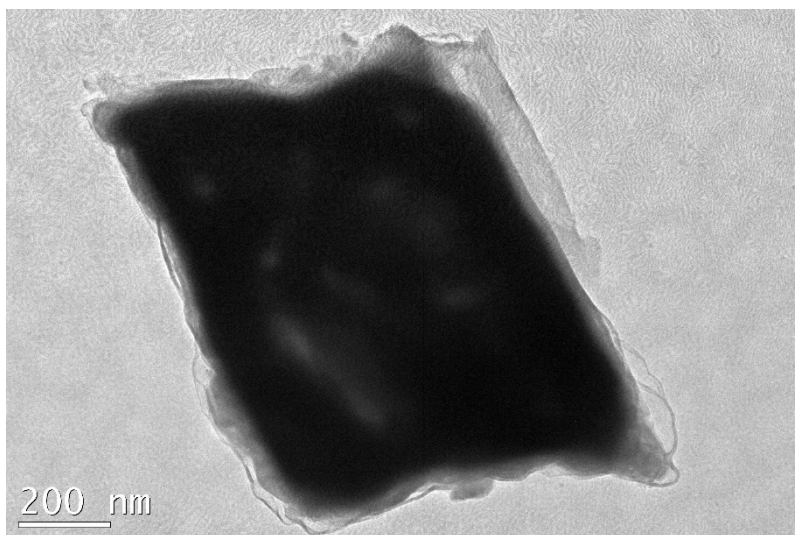

Fig. S2 Single particle magnification image of Fe<sub>3</sub>C-620@NC materials.

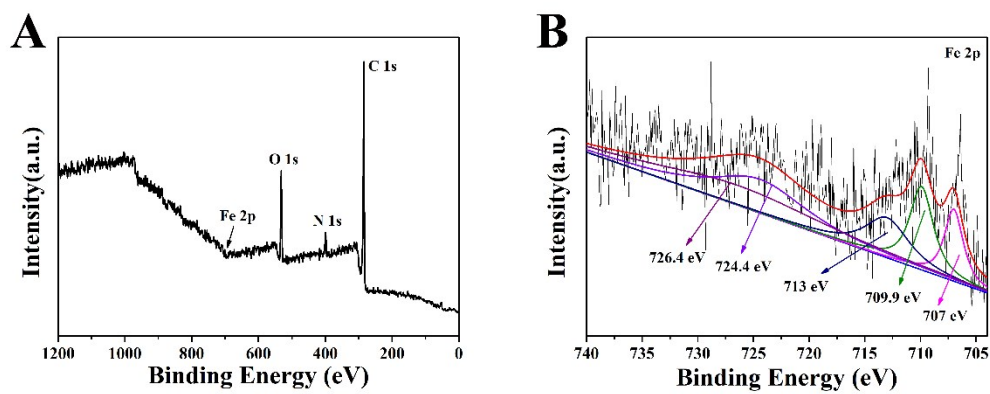

Fig. S3 (A) XPS full spectrum of Fe<sub>3</sub>C-620@NC materials and corresponding high-resolution spectrum of the (B) Fe 2p.

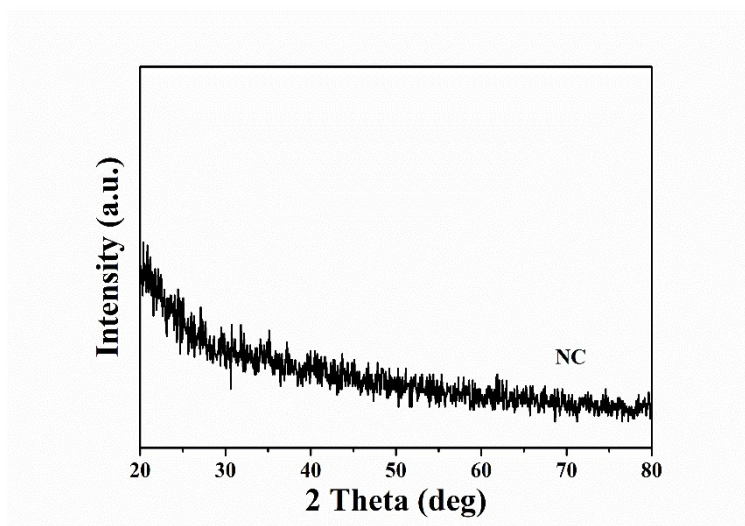

Fig. S4 XRD pattern of N-doped carbon (NC) by soaking  $\text{Fe}_5\text{C}_2\text{-Fe}_3\text{C@NC}$  catalyst in 0.5 M  $\text{H}_2\text{SO}_4$ .

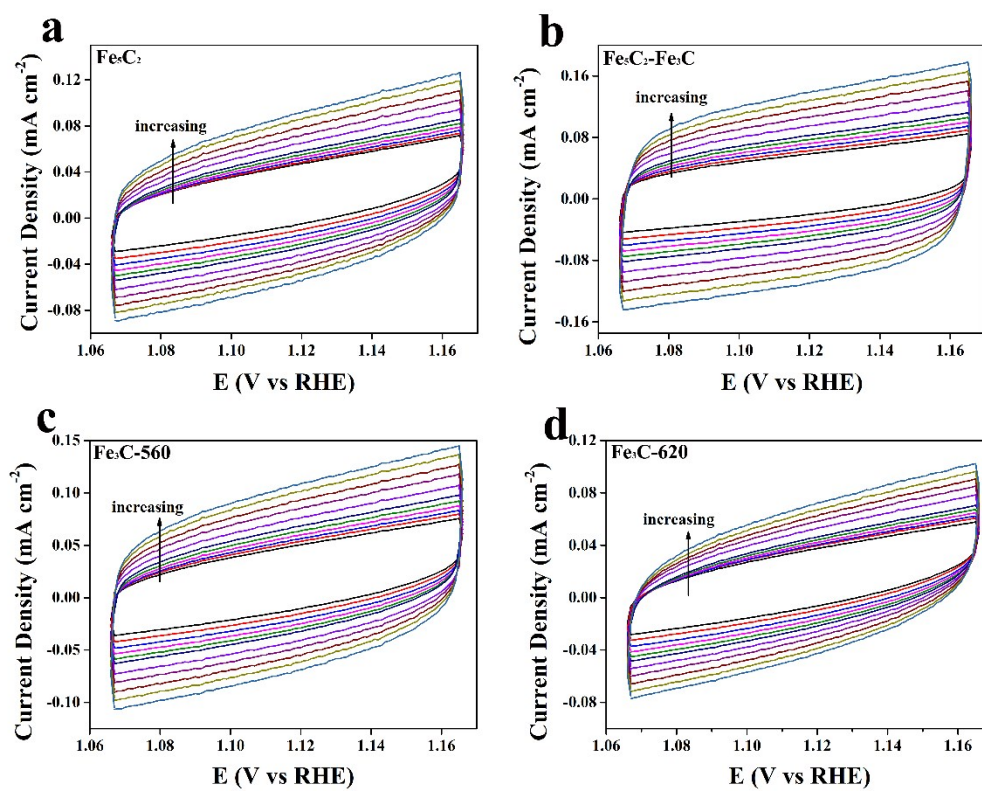

Fig. S5 CV curves of as-prepared ICs@NC catalysts under the potential window without faradaic processes.

Table S1 Content of elements on the surface of materials from the XPS analysis.

| Sample                             | C (at%) | N (at%) | Fe (at%) | O (at%) |
|------------------------------------|---------|---------|----------|---------|
| Fe <sub>3</sub> C <sub>2</sub> @NC | 80.26   | 3.27    | 0.6      | 15.87   |
| Fe <sub>3</sub> C-620@NC           | 79.96   | 5.27    | 0.53     | 14.24   |

Table S2 Magnetism data of as-prepared samples.

| Sample                             | $M_S$ (emu·g <sup>-1</sup> ) | $M_r$ (emu·g <sup>-1</sup> ) | $H_C$ (Oe) |
|------------------------------------|------------------------------|------------------------------|------------|
| Fe <sub>3</sub> O <sub>4</sub> @NC | 20.76                        | 0.85                         | 33.33      |
| Fe <sub>5</sub> C <sub>2</sub> @NC | 119.29                       | 15.92                        | 266.85     |
| Fe <sub>3</sub> C-560@NC           | 132.04                       | 14.03                        | 254.11     |
| Fe <sub>3</sub> C-620@NC           | 134.10                       | 13.20                        | 244.08     |



## References

[1] Fan X, Peng Z, Ye R, et al. M<sub>3</sub>C (M: Fe, Co, Ni) Nanocrystals Encased in Graphene Nanoribbons: An Active and Stable Bifunctional Electrocatalyst for Oxygen Reduction and Hydrogen Evolution Reactions[J]. ACS nano. 2015, 9(7): 7407.

[2] McCrory C C L, Jung S, Peters J C, et al. Benchmarking Heterogeneous Electrocatalysts for the Oxygen Evolution Reaction[J]. Journal of the American Chemical Society. 2013, 135(45): 16977-16987.
